# Supplementary material for: Designing multidimensional hydration inhibitor towards the long cycling performance of zinc powder anode
Source: Royal Society of Chemistry journal article supplement (doi:10.1039/d3ta02154h), 2023-01-01
Supplement: d3ta02154h1.pdf [file d3ta02154h1.pdf]

## Supporting Information

### Designing Multidimensional Hydration Inhibitor towards Long Cycling Performance of Zinc Powder Anode

Chuheng Cao,<sup>a</sup> Wencheng Du,<sup>\*b</sup> Cheng Chao Li,<sup>\*a</sup> Minghui Ye,<sup>a</sup> Yufei Zhang,<sup>a</sup>  
Yongchao Tang,<sup>a</sup> Xiaoqing Liu<sup>a</sup>

<sup>a</sup> Guangdong Provincial Key Laboratory of Plant Resources Biorefinery,  
School of Chemical Engineering and Light Industry, Guangdong University  
of Technology, Guangzhou 510006, P. R. China

<sup>b</sup> School of Advanced Manufacturing, Guangdong University of Technology,  
Jieyang 522000, P. R. China

### AUTHOR INFORMATION

#### Corresponding Author

\*E-mail:

licc@gdut.edu.cn

duwencheng@gdut.edu.cn

## Experimental section

**Chemicals:** graphite (325 mesh, Aladdin, 99.95 %), sodium citrate dihydrate (Aladdin, 99 %), Zn powder (Shanghai Tianxiang Nanomaterials Co., Ltd.), ZnSO<sub>4</sub>·7H<sub>2</sub>O (Aladdin, 99.9 %), 1-Vinylimidazole (Macklin, 99%), bromoacetic acid (Aladdin, 98%), acetone (Aladdin), diethyl ether (DAMAO), ethanol (Aladdin), 1-Methyl-2-pyrrolidinone (NMP, Aladdin, 99.9 %), polyvinylidene fluoride (PVDF, Aladdin), deionized water.

**Preparation of PG:** PG was made by organic salt-assisted ultrasonic nondestructive exfoliation of graphite under organic solvents as previously reported.<sup>1,2</sup> It is generally done by mixing 3 g of natural graphite and 9 g of sodium citrate with 100 mL of ethanol, and then sonicating the solid/liquid mixture for 3 h. The sonicated mixture was placed overnight, then the upper liquid layer was gathered, vacuum filtered, and washed with deionized water to obtain a PG filter cake.

**Preparation of Zn powder/PG:** To prepare Zn powder/PG, 180 mg of Zn powder and 30 mg of PG were added to a mortar and ground and mixed well. Then the mixture was transferred to a 3 ml slurry bottle, and 300 μL NMP was added and stirred overnight to obtain a viscous mixture. The mixture was coated on a copper mesh (12 mm diameter) and dried overnight in a vacuum oven at 80°C. Finally, the dried zinc powder/PG on the copper mesh was pressurized at 10 MPa to obtain a usable zinc powder/PG electrode slice. The mass loading of Zn powder in anodes was about 7~8 mg cm<sup>-2</sup>.

**Preparation of CAVImBr:** 1-Vinylimidazole (10.0 g, 0.106 mol) and bromoacetic acid (14.7 g, 0.106 mol) were added to 70.0 mL of acetone as a mixture in a 100 mL flask. The mixture was stirred at room temperature for 24 h. The mixture was filtered off, washed with diethyl ether, and finally dried under vacuum at room temperature.

**Preparation of rGO hydrogel:** rGO hydrogel is obtained via the hydrothermal method.<sup>3</sup> A series of 0.5 mL of graphene oxide dispersion (4.0 mg mL<sup>-1</sup>) was added in bottle glass (3mL in

size) and then sealed in a 25 mL Teflon lined stainless steel autoclave and then thermal treatment at 180 °C for 2.5 h. After cooling naturally, the product was washed with water.

**Preparation of  $\text{NH}_4\text{V}_4\text{O}_{10}$ :** 1.170 g of  $\text{NH}_4\text{VO}_3$  was dissolved in 40 mL of 80 °C deionized water to form a light yellow solution. After that, 1.891 g of  $\text{H}_2\text{C}_2\text{O}_4 \cdot 2\text{H}_2\text{O}$  solid powder was added to the solution under magnetic stirring until it turned blackish green. The solution was transferred to a 50 ml autoclave and kept in an oven at 140 °C for 48 hours. After natural cooling of the sample to room temperature, the product was collected and washed repeatedly with deionized water. The final product was dried at 60 °C for 12 h to obtain  $\text{NH}_4\text{V}_4\text{O}_{10}$ .

**Preparation of electrolytes:** The electrolytes were prepared by mixing 2M  $\text{ZnSO}_4$  with 1.20M, 1.25M, 1.30M CAVImBr and deionized water in the air. The dosages of electrolyte in a coin cell are 120  $\mu\text{L}$ .

### **Characterizations:**

The morphology characterizations were measured by electron microscope (SEM, Hitachi S-3400N, Japan). XRD patterns were carried out by Rigaku MiniFlex600 powder X-ray diffractometer with  $\text{Cu K}\alpha$  radiation (PXRD, Rigaku MiniFlex600, Japan). The Raman spectra were obtained by using a Raman spectrometer (LabRAM HR Evolution, France). The ionic conductivity of electrolytes was measured by a Conductivity meter (DDS-308A, China). The contact angle of electrolytes was measured by the Contact Angle Analyzer (OCA100, Germany). AFM height images were measured by Scanning Probe Microscope (Dimension FastScan, USA).  $^1\text{H}$ -NMR spectrum was measured by Superconducting Fourier nuclear magnetic resonance apparatus (AVANCE III 400 MHz, SH). The X-ray photoelectron spectroscopy (XPS) analysis was carried out by Escalab 250 Xi X-ray photoelectron spectrometer (Thermo Fisher).

### **Electrochemical measurements:**

The electrochemical performances of Zn powder/PG composites were evaluated with a CR2032 coin cell. Glass fiber filter paper (675 $\mu$ m, Whatman GF/D) was used as the separator. The galvanostatic plating/stripping curves of Zn were performed on a NEWARE battery testing system conducted at different current densities with a series of areal capacities. Tafel plots were measured in the three-electrode electrochemical cell on Gamry electrochemical workstation. Linear sweep voltammetry (LSV) and cyclic voltammetry (CV) were assembled into coin cells for testing on Gamry electrochemical workstation with a scanning rate of 1mV s<sup>-1</sup>. Electrochemical impedance spectroscopy (EIS) measurements are recorded on an electrochemical workstation in the frequency range from 100 kHz to 0.01Hz.

For NH<sub>4</sub>V<sub>4</sub>O<sub>10</sub>||Zn powder/PG full cells, to prepare the NH<sub>4</sub>V<sub>4</sub>O<sub>10</sub> cathode, the NH<sub>4</sub>V<sub>4</sub>O<sub>10</sub>, carbon black and PVDF binder were mixed in a weight ratio of 7:2:1 with NMP as solvent to form a homogeneous slurry. This slurry was then uniformly spread onto carbon paper, and then dried at 80°C in a vacuum oven for a whole night. The mass loading of active material in cathodes was about 3~4 mg cm<sup>-2</sup>. The coin cells were assembled in the atmosphere at room temperature. The cells were galvanostatically charged and discharged between 0.3 and 1.3 V versus Zn<sup>2+</sup>/Zn on a Neware battery tester. The specific capacities were calculated based on the mass of NH<sub>4</sub>V<sub>4</sub>O<sub>10</sub>.

For PANI||Zn powder/PG full cells, the commercial PANI, carbon black and PVDF binder were mixed in a weight ratio of 5:4:1 with NMP as solvent to form a homogeneous slurry. This slurry was then uniformly spread onto carbon paper, and then dried at 80°C in a vacuum oven for a whole night. The mass loading of active material in cathodes was about 1~2 mg cm<sup>-2</sup>. The coin cells were assembled in the atmosphere at room temperature and filter paper was used as a separator. The cells were galvanostatically charged and discharged between 0.5 and 1.6 V versus Zn<sup>2+</sup>/Zn on a Neware battery tester. The specific capacities were calculated based on the mass of PANI.

Electrochemical performances of Zinc-ion capacitors (ZICs) were tested using two-electrode cells. Assembly of the two-electrode cells was similar to the reported method for the capacitor (**Scheme S1**).<sup>4,5</sup> Zn powder/PG as negative electrodes, and rGO-loaded carbon paper with 1 mg solid materials served as positive electrodes. Filter paper as the separator, and 107  $\mu\text{L}$  electrolyte was used. Galvanostatic charging/discharging (GCD), and open circuit potential-time curve were performed by an electrochemical workstation (DyneChem).

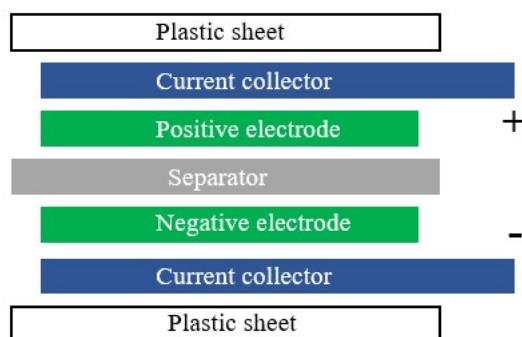

**Scheme S1** Schematic illustration of a ZIC cell

The specific gravimetric capacitance ( $C_g$ ,  $\text{F g}^{-1}$ ) of rGO was calculated using GCD curves by the following formula:

$$C_g = I \times \Delta t / (m \times \Delta U)$$

where  $I$  is the current density,  $\Delta t$  is the discharging time,  $m$  is the mass loading of rGO, and  $\Delta U$  is the voltage difference of the discharge curve.

### Theoretical computational details

The binding energy calculations were performed using the Gaussian 16 package. And the structures of the molecules were optimized at the B3LYP/6-311G(d) level for H, O, and Br elements and B3LYP/SDD level for Zn. The binding energy ( $E_b$ ) between Zn ions and  $\text{H}_2\text{O}$  solvent or Br ions is defined as follows:

$$E_b = E_{complex} - E_{cation} - E_{solvent/anion}$$

where  $E_{complex}$  is the total energy of cation-solvent/anion complex,  $E_{cation}$  is the energy of a cation,  $E_{solvent/anion}$  is the energy of a solvent or anion.

The adsorption energies in this work were performed in the framework of the density functional theory (DFT) with the projector augmented plane-wave method, as implemented in the Vienna ab initio simulation package (VASP).<sup>6, 7</sup> The generalized gradient approximation proposed by Perdew-Burke-Ernzerhof (PBE), is selected for the exchange-correlation potential.<sup>8</sup> The cut-off energy for a plane wave is set to 400 eV. The energy criterion is set to  $10^{-4}$  eV in the iterative solution of the Kohn-Sham equation. All the structures are relaxed until the residual forces on the atoms have declined to less than 0.02 eV/Å. The adsorbed energy between the Zn slab and H<sub>2</sub>O/CAVIm<sup>+</sup> solvent or Br ions were defined as the following equation:

$$E_{ad} = E_{Zn - slab + solvent/anion} - E_{Zn - slab} - E_{solvent/anion}$$

Where  $E_{Zn - slab + solvent/anion}$  is the total energy of Zn-slab with absorbed solvent or anion,  $E_{Zn - slab}$  is the energy of a free Zn-slab,  $E_{solvent}$  is the energy of a solvent.

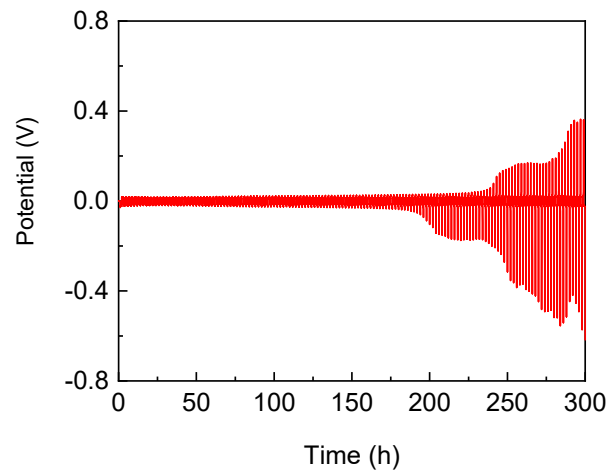

**Figure S1** Severe polarization of Zn powder/PG electrodes symmetric cells in ZnSO<sub>4</sub> electrolyte at 1mA cm<sup>-2</sup> with a capacity of 1mAh cm<sup>-2</sup>.

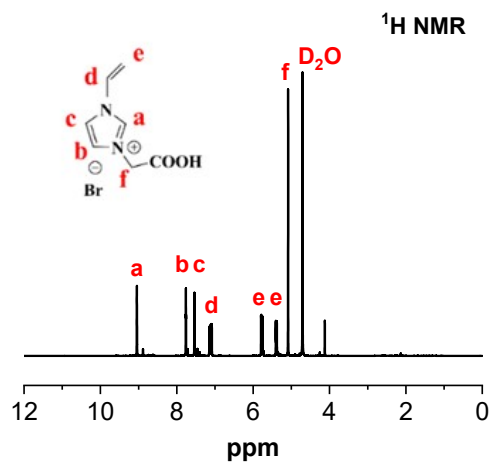

**Figure S2** <sup>1</sup>H-NMR spectrum of 1-carboxymethyl-3-vinylimidazolium bromide.



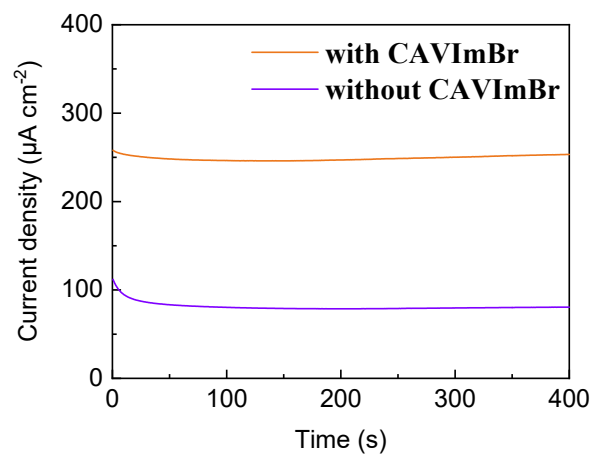

**Figure S3** The Chronoamperograms of Zn powder/PG symmetric cells in ZnSO<sub>4</sub> electrolyte with and without CAVImBr at 10 mV.

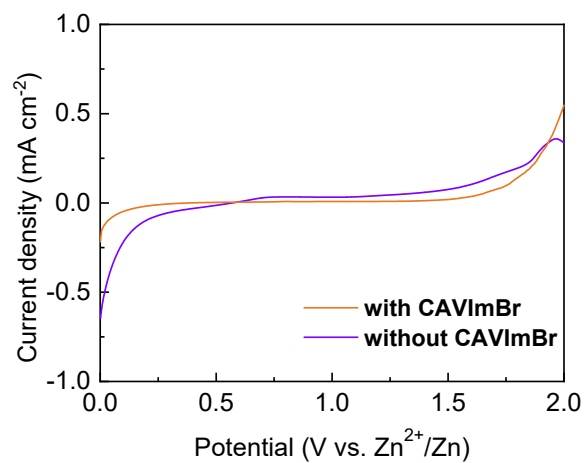

**Figure S4** Electrochemical windows of ZnSO<sub>4</sub> electrolyte with and without CAVImBr.

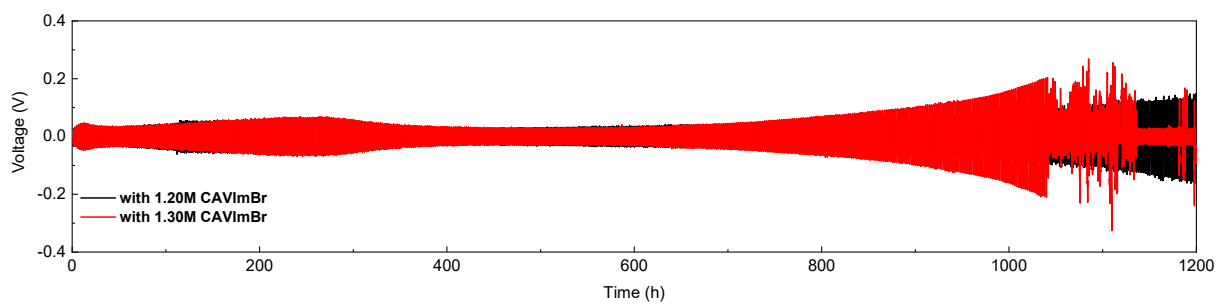

**Figure S5** Cycling performance of Zn powder/PG electrodes symmetric cells in  $\text{ZnSO}_4$  electrolyte with 1.20M and 1.30 M CAVImBr at  $1\text{mA cm}^{-2}$  with a capacity of  $1\text{mAh cm}^{-2}$ .

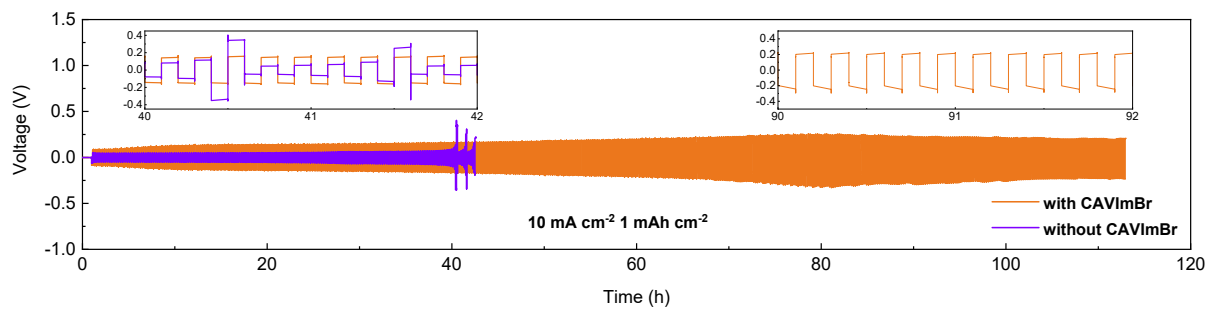

**Figure S6** Cycling performance of Zn powder/PG electrodes symmetric cells in ZnSO<sub>4</sub> electrolyte with and without CAVImBr at 10 mA cm<sup>-2</sup> with a capacity of 1 mAh cm<sup>-2</sup>.

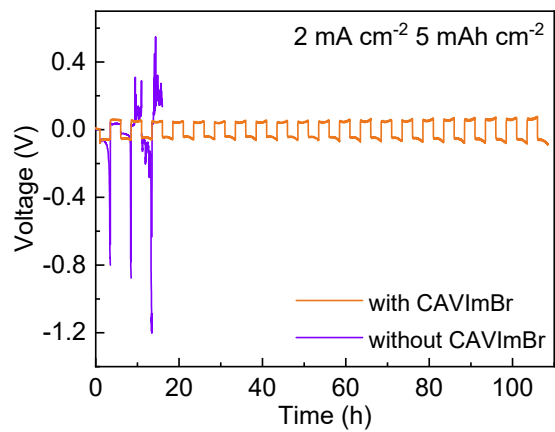

**Figure S7** Cycling performance of Zn powder/PG electrodes symmetric cells in ZnSO<sub>4</sub> electrolyte with and without CAVImBr at 2 mA cm<sup>-2</sup> with a capacity of 5 mAh cm<sup>-2</sup> (DOD=86%).

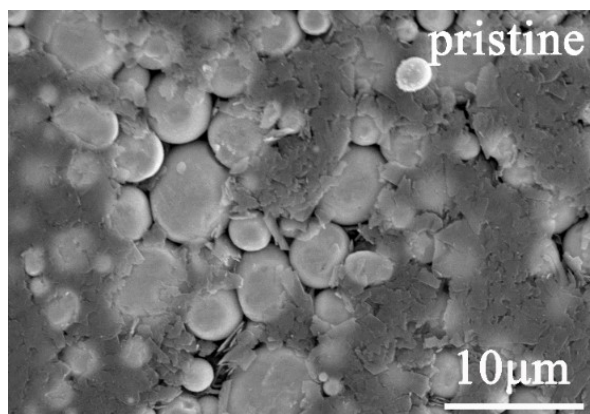

**Figure S8** Top view SEM images of pristine Zn powder/PG electrodes.

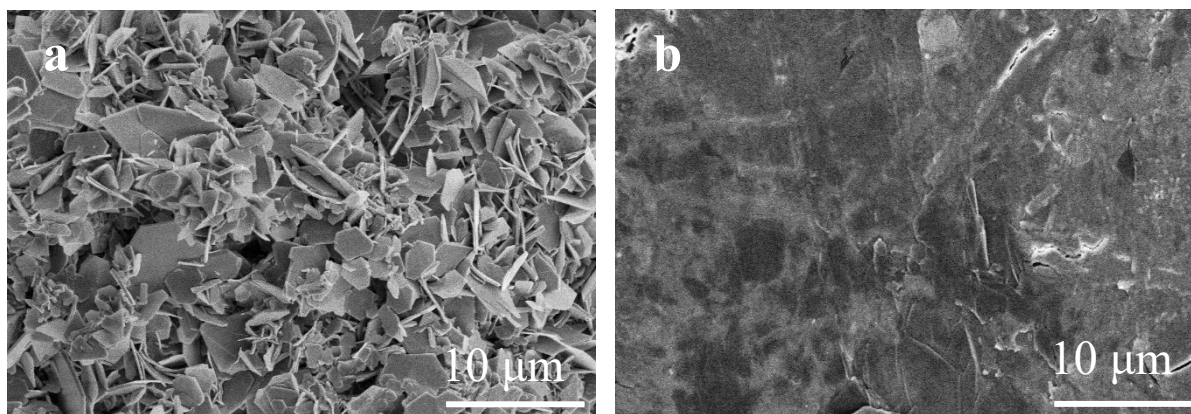

**Figure S9** Top view SEM images of Zn powder/PG electrodes symmetrical cells after 20 cycles in ZnSO<sub>4</sub> electrolyte (a) without CAVImBr and (b) with CAVImBr (3 mA cm<sup>-2</sup>, 3 mAh cm<sup>-2</sup>).

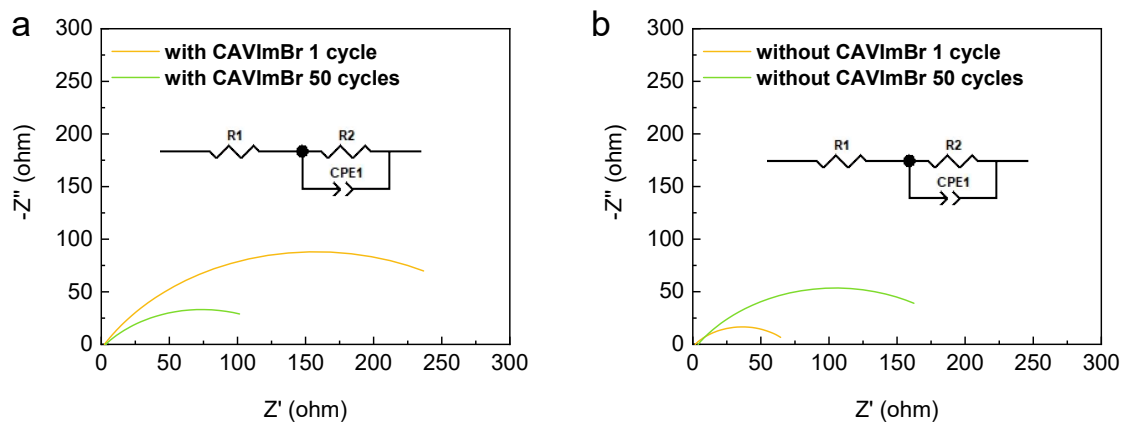

**Figure S10** Nyquist plots of Zn powder/PG electrodes symmetrical cells after 1 and 50 cycles in  $ZnSO_4$  electrolyte (a) with CAVImBr and (b) without CAVImBr ( $1\text{ mA cm}^{-2}$ ,  $1\text{ mAh cm}^{-2}$ ). The inset is the equivalent circuit of EIS.



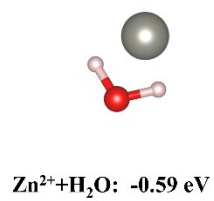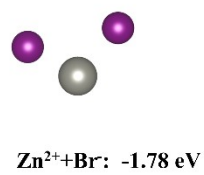

**Figure S11** The binding energy of  $\text{Zn}^{2+}$  with  $\text{H}_2\text{O}$  molecules and  $\text{Br}^-$ .

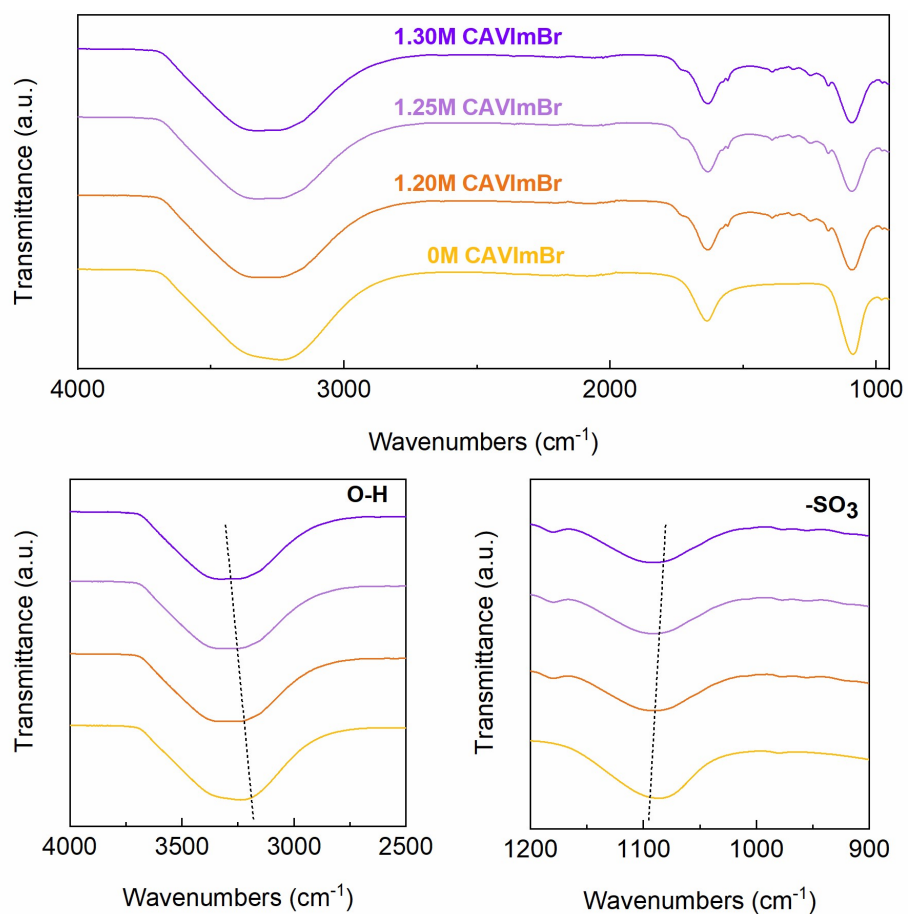

**Figure S12** FTIR spectra of O-H (a) and  $\text{-SO}_4^{2-}$  (b) stretching vibration range with different concentrations of CAVImBr added in the 2M  $\text{ZnSO}_4$  electrolytes.



Zn (101) – CAVIm<sup>+</sup>

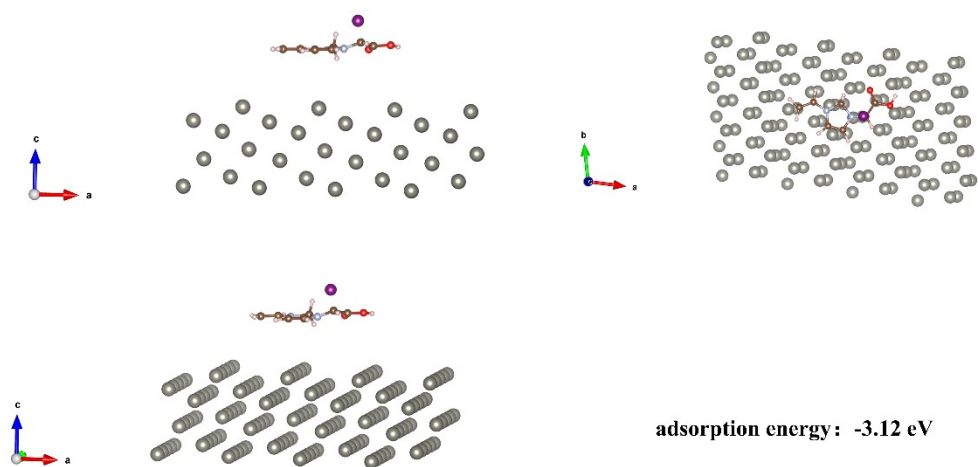

**Figure S13** The adsorption energy of CAVIm<sup>+</sup> on the Zn (101) plane.

Zn (101) – H<sub>2</sub>O

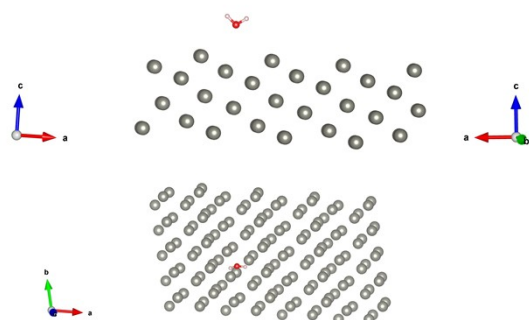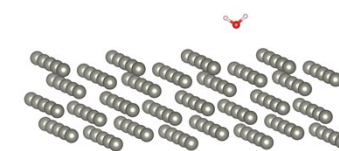

adsorption energy: -0.11 eV

Zn (101) – Br<sup>-</sup>

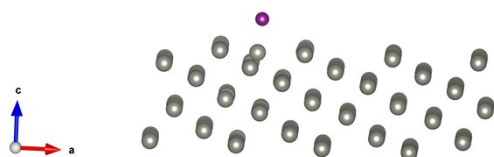

adsorption energy: -0.97 eV

**Figure S14** The adsorption energy of H<sub>2</sub>O molecules and Br<sup>-</sup> on the Zn (101) plane.

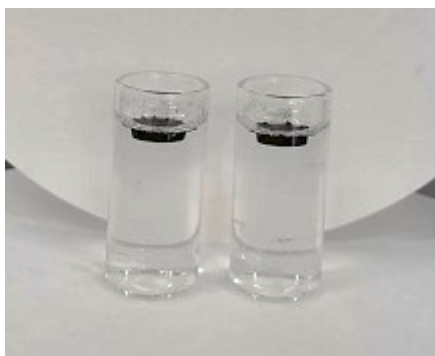

**Figure S15** The digital image of rGO hydrogel prepared by hydrothermal method.

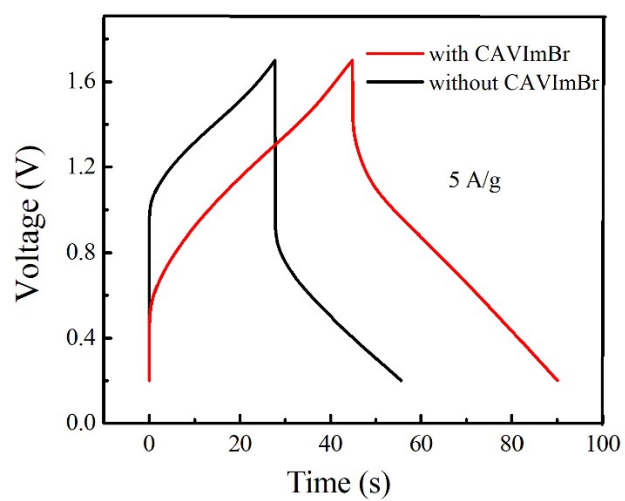

**Figure S16** GCD curves at the current density of  $5\text{ A g}^{-1}$  for ZIC devices in  $\text{ZnSO}_4$  electrolyte with and without CAVImBr.

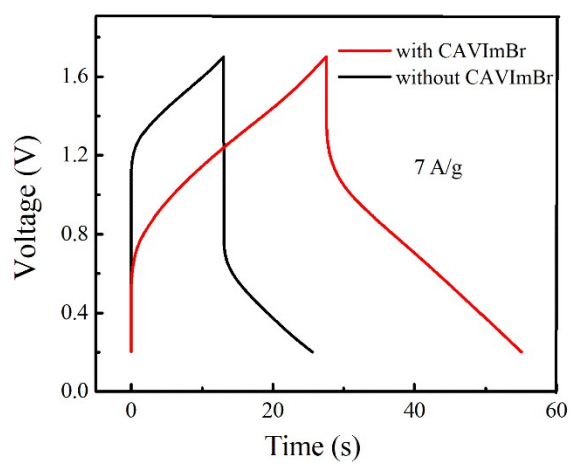

**Figure S17** GCD curves at the current density of  $7 \text{ A g}^{-1}$  for ZIC devices in  $\text{ZnSO}_4$  electrolyte with and without CAVImBr.



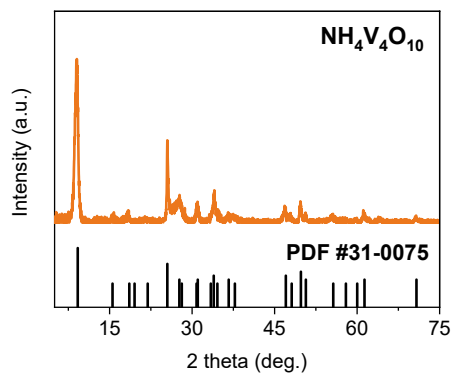

**Figure S18** XRD pattern of the as-prepared  $\text{NH}_4\text{V}_4\text{O}_{10}$ .

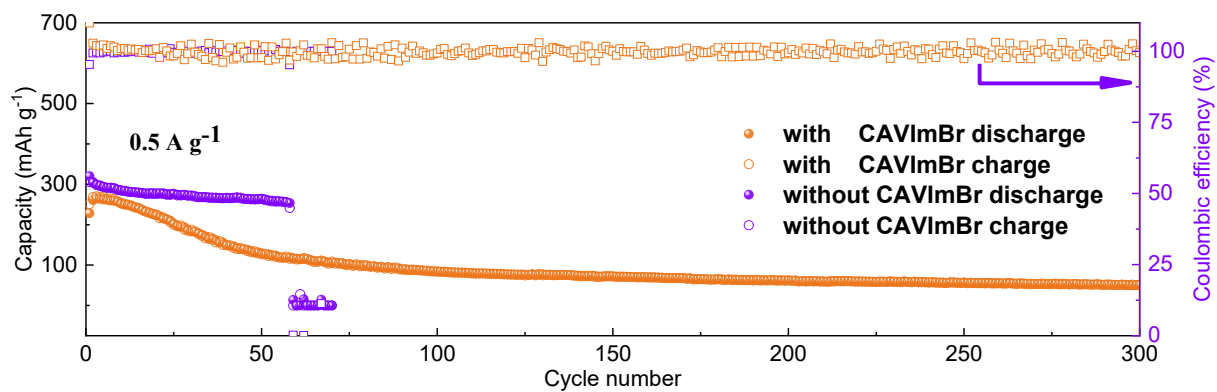

**Figure S19** Comparison of cycling performances of  $\text{NH}_4\text{V}_4\text{O}_{10}||\text{Zn}$  powder/PG full cells with and without CAVImBr added in the 2M  $\text{ZnSO}_4$  electrolytes at a rate of  $0.5 \text{ A g}^{-1}$ .

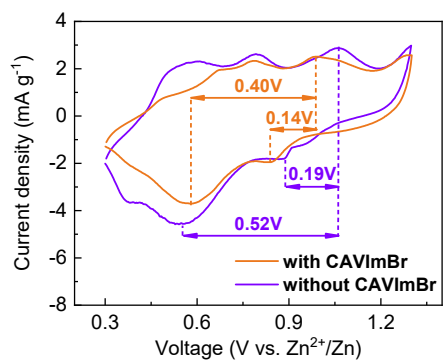

**Figure S20** The CV curves of  $\text{NH}_4\text{V}_4\text{O}_{10}||\text{Zn}$  powder/PG full cells with and without CAVImBr added in the 2M  $\text{ZnSO}_4$  electrolytes.

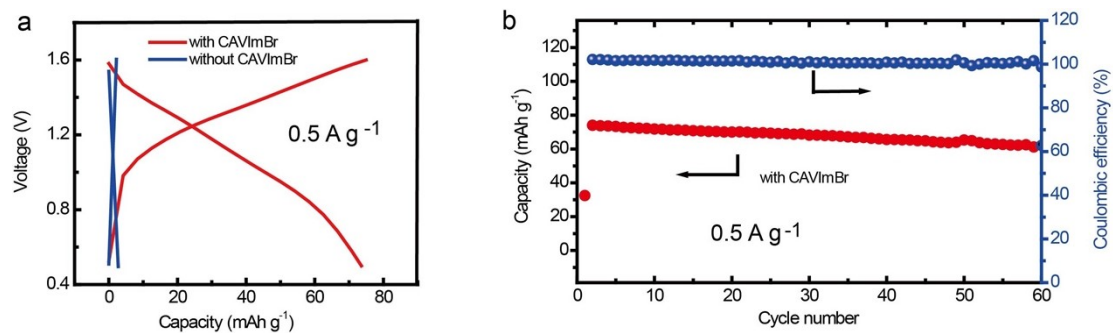

**Figure S21** (a) Galvanostatic charge/discharge curves of PANI||Zn powder/PG batteries with and without CAVImBr added in the 2M  $\text{ZnSO}_4$  electrolytes at a rate of  $0.5 \text{ A g}^{-1}$ , and (b) corresponding cycling performance of PANI||Zn powder/PG full cell.

**Table S1** Comparison of electrochemical performances of this work with previously reported symmetric Zn-based cells.

| Zn-based anodes                                   | Electrolyte                                                                                           | Current density, Capacity (mA cm <sup>-2</sup> , mAh cm <sup>-2</sup> ) | Lifespan (hour)                  | DOD (%) | Ref.      |
|---------------------------------------------------|-------------------------------------------------------------------------------------------------------|-------------------------------------------------------------------------|----------------------------------|---------|-----------|
| Ti <sub>3</sub> C <sub>2</sub> Tx MXene@Zn Powder | 2 M ZnSO <sub>4</sub>                                                                                 | 1-0.5                                                                   | 200                              | -       | [9]       |
| Zn powder/PG                                      | 2 M ZnSO <sub>4</sub>                                                                                 | 1-1<br>5-0.5                                                            | 400<br>360                       | 15      | [10]      |
| Zn-P-MIEC                                         | 2 M ZnSO <sub>4</sub>                                                                                 | 0.25-0.05<br>1-1<br>2-2<br>5-2<br>10-1                                  | 1270<br>400<br>220<br>180<br>100 | -       | [11]      |
| Zn powder                                         | 1 M Zn(TFSI) <sub>2</sub> + 20 M LiTFSI                                                               | 0.2-0.068                                                               | 170                              | -       | [12]      |
| Zn foil                                           | 30 mol.% H <sub>2</sub> O in a eutectic mixture of urea/LiTFSI/Zn(TFSI) <sub>2</sub>                  | 0.02-0.2                                                                | 450                              | ~1.8    | [13]      |
| Zn plate                                          | 0.5 M Zn(CF <sub>3</sub> SO <sub>3</sub> ) <sub>2</sub> in triethyl phosphate: H <sub>2</sub> O (7:3) | 1-1                                                                     | 200                              | ~0.7    | [14]      |
| Zn powder/PG                                      | 2 M ZnSO <sub>4</sub> +<br>1.25 M CAVImBr                                                             | 1-1<br>5-1<br>10-1                                                      | 1100<br>245<br>115               | 17      | This work |

## References

- 1 W. Du, J. Lu, P. Sun, Y. Zhu and X. Jiang, *Chem. Phys. Lett.*, 2013, **568-569**, 198-201.
- 2 W. Du, S. Qi, Y. Zhu, P. Sun, L. Zhu and X. Jiang, *Chem. Eng. J.*, 2015, **262**, 658-664.
- 3 Yuxi Xu, Kaixuan Sheng, Chun Li and G. Shi, *ACS Nano*, 2010, **4**, 4324-4330.
- 4 Meryl D. Stoller, Sungjin Park, Yanwu Zhu, Jinho An and R. S. Ruoff, *Nano Lett.*, 2008, **8**, 3498-3502.
- 5 Qiong Wu, Yuxi Xu, Zhiyi Yao, Anran Liu and G. Shi, *ACS Nano*, 2010, **4**, 1963-1970.
- 6 John P. Perdew, Kieron Burke and M. Ernzerhof, *Phys. Rev. Lett.*, 1996, **77**, 3865-3868.
- 7 G. Kresse and J. Furthmüller, *Phys. Rev. B*, 1996, **54**, 11169-11186.
- 8 R. Xiao, H. Li and L. Chen, *Sci. Rep.*, 2015, **5**, 14227.
- 9 X. Li, Q. Li, Y. Hou, Q. Yang, Z. Chen, Z. Huang, G. Liang, Y. Zhao, L. Ma, M. Li, Q. Huang and C. Zhi, *ACS Nano*, 2021, **15**, 14631-14642.
- 10 W. Du, S. Huang, Y. Zhang, M. Ye and C. C. Li, *Energy Storage Mater.*, 2022, **45**, 465-473.
- 11 M. Zhang, P. Yu, K. Xiong, Y. Wang, Y. Liu and Y. Liang, *Adv. Mater.*, 2022, **34**, 2200860.
- 12 F. Wang, O. Borodin, T. Gao, X. Fan, W. Sun, F. Han, A. Faraone, J. A. Dura, K. Xu and C. Wang, *Nat. Mater.*, 2018, **17**, 543-549.
- 13 J. Zhao, J. Zhang, W. Yang, B. Chen, Z. Zhao, H. Qiu, S. Dong, X. Zhou, G. Cui and L. Chen, *Nano Energy*, 2019, **57**, 625-634.
- 14 A. Naveed, H. Yang, J. Yang, Y. Nuli and J. Wang, *Angew. Chem. Int. Ed.*, 2019, **58**, 2760-2764.
